# Supplementary material
Source: PubMed Central journal article supplement (PMC4790811)
Supplement: garj005500.wt1_default.pdf [file garj005500.wt1_default.pdf]

## Appendix 1:

Sensitivity analysis of excluded risk factors with  $p > 0.05$

| VARIABLE                          | aRR ^ | 95% CI    | p-value |
|-----------------------------------|-------|-----------|---------|
| <b>EXCLUDED VARIABLES</b>         |       |           |         |
| Previous stillbirths              | 1.7   | 0.7 - 4.2 | 0.27    |
| Late booking (13+ weeks)          | 1.2   | 0.9 - 1.7 | 0.19    |
| Not taking folic acid antenatally | 1.0   | 0.7 - 1.4 | 0.90    |
| Pre-existing hypertension         | 0.9   | 0.4 - 2.0 | 0.82    |
| Gestational diabetes              | 1.1   | 0.5 - 2.3 | 0.90    |
| Pregnancy induced hypertension    | 0.7   | 0.4 - 1.2 | 0.19    |
| Partner not employed              | 1.0   | 0.7 - 1.4 | 0.95    |
| No partner                        | 0.7   | 0.4 - 1.1 | 0.12    |
| Mother not employed               | 1.0   | 0.7 - 1.3 | 0.85    |

^ aRR: adjusted relative risk; CI: 95% confidence interval
