# Supplementary material
Source: PubMed Central journal article supplement (PMC4790811)
Supplement: garj005500.wt2_default.pdf [file garj005500.wt2_default.pdf]

## Appendix 2:

Sensitivity analysis with variance estimates adjusted for clustering maternity units

| VARIABLE                              | aRR         | Results from Table 2 |         | Adjusted for clustering by maternity units |         |
|---------------------------------------|-------------|----------------------|---------|--------------------------------------------|---------|
|                                       |             | 95% CI               | p-value | 95% CI                                     | p-value |
| <b>Parity</b>                         |             |                      |         |                                            |         |
| Para 0                                | <b>1.8</b>  | 1.3 - 2.5            | <0.01   | 1.3 - 2.3                                  | <0.01   |
| para 3+                               | <b>1.6</b>  | 1.0 - 2.5            | 0.05    | 1.1 - 2.3                                  | 0.03    |
| <b>Ethnic origin / place of birth</b> |             |                      |         |                                            |         |
| African <sup>1</sup>                  | <b>2.4</b>  | 1.2 - 4.6            | 0.01    | 1.3 - 4.3                                  | 0.01    |
| African Caribbean <sup>1</sup>        | <b>2.3</b>  | 1.3 - 4.1            | 0.01    | 1.3 - 3.9                                  | <0.01   |
| Indian <sup>1</sup>                   | <b>2.1</b>  | 1.3 - 3.5            | <0.01   | 1.4 - 3.2                                  | <0.01   |
| Pakistani non-UK                      | <b>3.0</b>  | 1.9 - 4.8            | <0.01   | 1.7 - 5.3                                  | <0.01   |
| <b>Body Mass Index</b>                |             |                      |         |                                            |         |
| 30-34.9                               | 1.4         | 1.0 - 2.0            | 0.07    | 1.0 - 2.0                                  | 0.05    |
| 35+                                   | <b>1.6</b>  | 1.1 - 2.4            | 0.03    | 1.2 - 2.1                                  | <0.01   |
| <b>Mental health history</b>          | <b>1.4</b>  | 1.0 - 1.9            | 0.06    | 1.1 - 1.8                                  | 0.02    |
| <b>Pre-existing diabetes</b>          | <b>3.9</b>  | 1.7 - 8.9            | <0.01   | 2.1 - 7.3                                  | <0.01   |
| <b>Antepartum haemorrhage</b>         | <b>3.4</b>  | 2.6 - 4.5            | <0.01   | 2.5 - 4.6                                  | <0.01   |
| <b>Smoking, no FGR</b>                |             |                      |         |                                            |         |
| Mother smoker                         | <b>2.5</b>  | 1.7 - 3.6            | <0.01   | 1.4 - 4.2                                  | <0.01   |
| Passive smoker                        | 1.3         | 0.8 - 2.0            | 0.28    | 0.9 - 1.9                                  | 0.23    |
| <b>Smoking, with FGR</b>              |             |                      |         |                                            |         |
| Mother smoker                         | <b>5.7</b>  | 3.6 - 8.9            | <0.01   | 3.7 - 8.7                                  | <0.01   |
| Passive smoker                        | <b>10.2</b> | 6.6 - 15.8           | <0.01   | 6.6 - 15.9                                 | <0.01   |
| <b>FGR - non-smoking</b>              | <b>7.8</b>  | 5.6 - 10.9           | <0.01   | 5.7 - 10.9                                 | <0.01   |

aRR: adjusted relative risk; CI: 95% confidence interval;

<sup>1</sup> UK and non-UK ethnic groups combined because of small numbers

FGR= fetal growth restriction (birthweight <10<sup>th</sup> GROW centile)
